# Supplementary material for: Prevalence of malaria infection in pregnant women compared with children for tracking malaria transmission in sub-Saharan Africa: a systematic review and meta-analysis
Source: PubMed Central journal article supplement (PMC4673091; doi:10.1016/s2214-109x(15)00049-2), 2015-08-19
Supplement: mmc1.pdf [file mmc1.pdf]

## Supplementary appendix

This appendix formed part of the original submission and has been peer reviewed. We post it as supplied by the authors.

Supplement to: van Eijk AM, Hill J, Noor AM, Snow RW, ter Kuile FO. Prevalence of malaria infection in pregnant women compared with children for tracking malaria transmission in sub-Saharan Africa: a systematic review and meta-analysis. *Lancet Glob Health* 2015; published online Aug 19. [http://dx.doi.org/10.1016/S2214-109X\(15\)00049-2](http://dx.doi.org/10.1016/S2214-109X(15)00049-2).

# Supplement

## Contents

|                                                                                                                                                                                                                          |           |
|--------------------------------------------------------------------------------------------------------------------------------------------------------------------------------------------------------------------------|-----------|
| Supplement S1: Study quality assessment.....                                                                                                                                                                             | 2         |
| <i>Table S1: Quality assessment of 18 sources included in the comparison of malaria in pregnant women versus children 0-59 months, sub-Saharan Africa, 1983-2012.....</i>                                                | <i>3</i>  |
| Supplement S2: Insecticide treated net us by pregnant women and children .....                                                                                                                                           | 6         |
| <i>Figure S2: Scatterplot of use of insecticide nets (%) by pregnant women and children &lt;5 years of age among surveys included in this review, sub Saharan Africa, 2002-2012.....</i>                                 | <i>6</i>  |
| Supplement S3: Sources used for an HIV estimate .....                                                                                                                                                                    | 7         |
| <i>Figure S3: Scatterplot of HIV prevalence among women aged 15-49 years (%) versus persons aged 15-49 years (%) (both genders) among 47 national surveys conducted between 2001 and 2014 in sub Saharan Africa.....</i> | <i>7</i>  |
| Supplement S4: Metaregression of the prevalence ratio of malaria among children 0-59 months versus pregnant women by gravidity .....                                                                                     | 8         |
| <i>Table S4a: Meta-regression of factors potentially affecting the prevalence ratio of malaria among children 0-59 months of age versus primigravidae, sub-Saharan Africa, 1983-2012.....</i>                            | <i>8</i>  |
| <i>Table S4b: Meta-regression of factors potentially affecting the prevalence ratio of malaria among children 0-59 months of age versus multigravidae, 7 studies, sub-Saharan Africa, 1983-2012 .....</i>                | <i>9</i>  |
| Supplement S5: Antenatal clinic attendance in malarious countries in sub-Saharan Africa by setting, 2008-2014.....                                                                                                       | 10        |
| <i>Table S5: Antenatal clinic attendance and timing of first antenatal visit in national surveys in malarious countries by setting and malaria prevalence among children, sub-Saharan Africa, 2008-2014 .....</i>        | <i>10</i> |
| References.....                                                                                                                                                                                                          | 11        |

## Supplement S1: Study quality assessment

### Quality assessment

Assessment of these surveys was based on source population, participant selection, completeness of outcome data, and measures to control confounding, after reviewing literature on quality assessment of observational studies.<sup>1,2</sup> Scores were not assigned, but quality was assigned as low-to-moderate or good. A study was deemed to be good if there was an appropriate source population and participant selection (in this case, pregnant women and children selected from the same location at about the same study period), an appropriate malaria test, no missing outcome data, and a description of characteristics of the study population(s), in particular age. Multivariate analysis was not included as a quality criterion because for almost all studies the comparison of malaria in children *versus* pregnant women was not the focus of the manuscript. Outcome was considered 'adequate' if more than 80% of participants initially enrolled were included in the analysis, 'unclear' if the percentage of initially enrolled participants included in the analysis was unclear, and 'inadequate' if less than 80% of those initially enrolled were included in the analysis.

**Table S1: Quality assessment of 18 sources included in the comparison of malaria in pregnant women versus children 0-59 months, sub-Saharan Africa, 1983-2012**

●: Adequate or appropriate. ○: Unclear from available information. ▲: Inappropriate or inadequate reported

| Author/year, type of material                             | Study source population described and adequate             | Inclusion/exclusion criteria described and adequate for study purpose         | Tests described, appropriate            | Incomplete outcome data         | Characteristics reported                                                     | Other bias and notes                    | Assessment quality for review |
|-----------------------------------------------------------|------------------------------------------------------------|-------------------------------------------------------------------------------|-----------------------------------------|---------------------------------|------------------------------------------------------------------------------|-----------------------------------------|-------------------------------|
| Angola MIS 2006-7 <sup>3</sup><br>Report                  | Community, both<br>●                                       | Yes<br>In random households selected from random clusters for the survey<br>● | Yes, rapid diagnostic malaria test<br>● | Children 9% missing, PW 0%<br>● | Yes, SES, area of residence, education, but not gravidity or age for PW<br>● | None detected<br>●                      | Good                          |
| Côte d'Ivoire DHS 2011-12 <sup>4</sup><br>Report          | Community, both<br>●                                       | Yes<br>In random households selected from random clusters for the survey<br>● | Yes, microscopy<br>●                    | Children 13% PW 21%<br>●        | Yes, SES, area of residence, education, but not gravidity or age for PW<br>● | None detected<br>●                      | Good                          |
| Deribew 2010 <sup>5</sup> Article                         | Community, both<br>●                                       | Yes<br>In villages in study area<br>●                                         | Yes, microscopy<br>●                    | Children 12%, NR for PW<br>▲    | Yes, for both<br>●                                                           | None detected<br>●                      | Low-to-moderate               |
| Dicko 2003, 2005 <sup>6,7</sup> Article                   | Yes, both from community<br>●                              | Yes, from villages randomly selected<br>●                                     | Yes, microscopy<br>●                    | Not reported<br>▲               | Characteristics partly presented (age only for children)<br>●                | None detected<br>●                      | Low-to-moderate               |
| Equatorial Guinea MIS Bioko 2008-9 <sup>8</sup><br>Report | Community, both<br>●                                       | Yes<br>In random households selected from random clusters for the survey<br>● | Yes, rapid diagnostic malaria test<br>● | Not reported<br>▲               | Children: yes<br>PW: none<br>●                                               | None detected<br>●                      | Low-to-moderate               |
| Graves 2009 <sup>9</sup> Article                          | Community, both<br>●                                       | Yes<br>In random households selected from random clusters for the survey<br>● | Yes, microscopy<br>●                    | Not reported<br>▲               | Not reported<br>▲                                                            | Considerable <i>P. vivax</i><br>▲       | Low-to-moderate               |
| Mabunda 2006 <sup>10</sup> Thesis                         | Yes, both from community<br>●                              | Yes, from villages randomly selected<br>●                                     | Yes, microscopy<br>●                    | Not reported<br>▲               | Yes, age and parity reported for PW<br>●                                     | Conducted over two malaria seasons<br>▲ | Low-to-moderate               |
| Matola 1985 <sup>11</sup> Article                         | MCH and ANC clinics of the same two health facilities<br>● | Not reported<br>▲                                                             | Yes, microscopy<br>●                    | Not reported<br>▲               | PW: mean age and parity reported. Children: mean age reported<br>●           | None<br>●                               | Low-to-moderate               |
| McElroy/Bloland 1999 <sup>12,13</sup> Article             | Community, both<br>●                                       | Yes, in study cohort<br>●                                                     | Yes, microscopy<br>●                    | Not reported<br>▲               | Yes<br>●                                                                     | None detected<br>●                      | Low-to-moderate               |

| Author/year, type of material                | Study source population described and adequate | Inclusion/exclusion criteria described and adequate for study purpose         | Tests described, appropriate            | Incomplete outcome data                     | Characteristics reported                                                  | Other bias and notes | Assessment quality for review |
|----------------------------------------------|------------------------------------------------|-------------------------------------------------------------------------------|-----------------------------------------|---------------------------------------------|---------------------------------------------------------------------------|----------------------|-------------------------------|
| Mozambique MIS 2007 <sup>14</sup><br>Report  | Community, both<br>●                           | Yes<br>In random households selected from random clusters for the survey<br>● | Yes, microscopy<br>●                    | Not reported<br>▲                           | Yes, SES, area of residence, education, but no gravidity, age for PW<br>● | None detected<br>●   | Low-to-moderate               |
| Namibia MIS 2009 <sup>15</sup><br>Report     | Community, both<br>●                           | Yes<br>In random households selected from random clusters for the survey<br>● | Yes, rapid diagnostic malaria test<br>● | 5% for children, 2% for pregnant women<br>● | No<br>▲                                                                   | None detected<br>●   | Low-to-moderate               |
| Nyan 2009 <sup>16</sup><br>Report            | Community, both<br>●                           | Yes<br>In random households selected from random clusters for the survey<br>● | Yes, rapid diagnostic malaria test<br>● | Not reported<br>▲                           | Yes, for both<br>●                                                        | None detected<br>●   | Low-to-moderate               |
| Rehman 2013 <sup>17</sup><br>Article         | Community, both<br>●                           | Yes<br>In random households selected from random clusters for the survey<br>● | Yes, rapid diagnostic malaria test<br>● | Children 7%<br>PW 42%<br>▲                  | Children: age<br>PW: none<br>▲                                            | None detected<br>●   | Low-to-moderate               |
| Rwanda DHS 2007-8 <sup>18</sup><br>Report    | Community, both<br>●                           | Yes<br>In random households selected from random clusters for the survey<br>● | Yes, microscopy<br>●                    | Children 14%<br>PW 5%<br>●                  | Yes, SES, area of residence, education, but no gravidity, age for PW<br>● | None detected<br>●   | Good                          |
| Rwanda DHS 2010-11 <sup>19</sup><br>Report   | Community, both<br>●                           | Yes<br>In random households selected from random clusters for the survey<br>● | Yes, microscopy<br>●                    | Not reported<br>▲                           | Yes, SES, area of residence, education, but no gravidity, age for PW<br>● | None detected<br>●   | Low-to-moderate               |
| South Sudan MIS 2009 <sup>20</sup><br>Report | Community, both<br>●                           | Yes<br>In random households selected from random clusters for the survey<br>● | Yes, rapid diagnostic malaria test<br>● | Children 3%<br>PW 17%<br>●                  | Yes, SES, area of residence, education, age but no gravidity for PW<br>●  | None detected<br>●   | Good                          |
| Sudan MIS 2005 <sup>21</sup><br>Report       | Community, both<br>●                           | Yes<br>In random households selected from random clusters for the survey<br>● | Yes, microscopy<br>●                    | Overall blood samples<br>7% missing<br>●    | Yes, area of residence but no other characteristics<br>●                  | None detected<br>●   | Good                          |
| Van Eijk 2008 <sup>22</sup><br>Article       | Yes, both from community<br>●                  | Yes, random selection for children, all pregnancies for PW in study area<br>● | Yes, microscopy<br>●                    | Children and PW<br><1%<br>●                 | Characteristics present for both<br>●                                     | None detected<br>●   | Good                          |

| Author/year, type of material | Study source population described and adequate | Inclusion/exclusion criteria described and adequate for study purpose | Tests described, appropriate | Incomplete outcome data | Characteristics reported | Other bias and notes | Assessment quality for review |
|-------------------------------|------------------------------------------------|-----------------------------------------------------------------------|------------------------------|-------------------------|--------------------------|----------------------|-------------------------------|
|                               | ●                                              | ●                                                                     | ●                            | ●                       | ●                        | ●                    |                               |

Abbreviations (in alphabetical order): ANC: antenatal clinic, DHS: Demographic and Health survey, MCH: Mother and Child Health Clinic, MIS: malaria indicator survey, NR: Not reported, PW: pregnant women, SES: socio-economic status

## Supplement S2: Insecticide treated net us by pregnant women and children

Figure S2: Scatterplot of use of insecticide nets (%) by pregnant women and children <5 years of age among surveys included in this review, sub Saharan Africa, 2002-2012

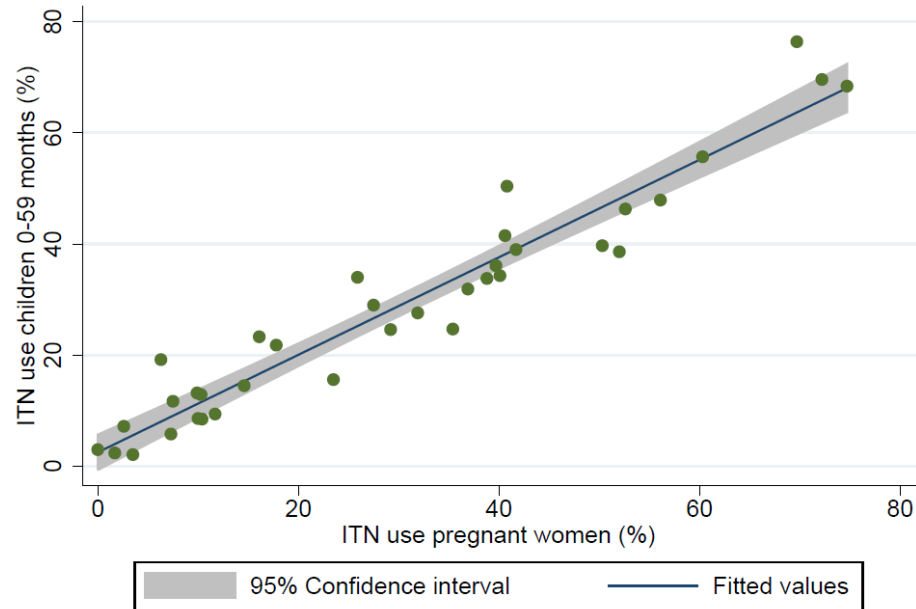

ITN: Insecticide treated net; ITN use defined as use of an insecticide treated net the night before the survey  
Pearson correlation coefficient 0.96

### Supplement S3: Sources used for an HIV estimate

#### Estimate HIV

If the malaria information was retrieved from a Demographic and Health survey (DHS) or an AIDS Indicator Survey (AIS) where HIV testing was conducted, results for HIV were obtained from the same report for women aged 15-49 years. If another source was used, results for HIV were obtained from a DHS or AIS report close in date (within 5 years). If this was not available, HIV estimates for the age group 15-49 years of age were obtained for the year involved from Index mundi and these were multiplied by 1.2 to obtain the estimate among women aged 15-49 years.<sup>23</sup> The multiplication factor was obtained after comparing HIV prevalence by gender in 47 African DHS reports with information on the overall HIV prevalence. For Mozambique, the prevalence by region (North, Central and South) was proportionally adjusted using the distribution of HIV among women reported in the AIS of 2009.<sup>10,24</sup> A study in Tanzania conducted at the start of the HIV-epidemic was assigned an arbitrary value of 0.5%.<sup>11</sup> In Kenya, women in Nyanza province were 2.6 times more likely to have HIV compared to the national estimate (both men and women), and this was taken into account for the HIV estimate for Kenya in 1992-1996.<sup>13,25</sup>

**Figure S3: Scatterplot of HIV prevalence among women aged 15-49 years (%) versus persons aged 15-49 years (%) (both genders) among 47 national surveys conducted between 2001 and 2014 in sub Saharan Africa**

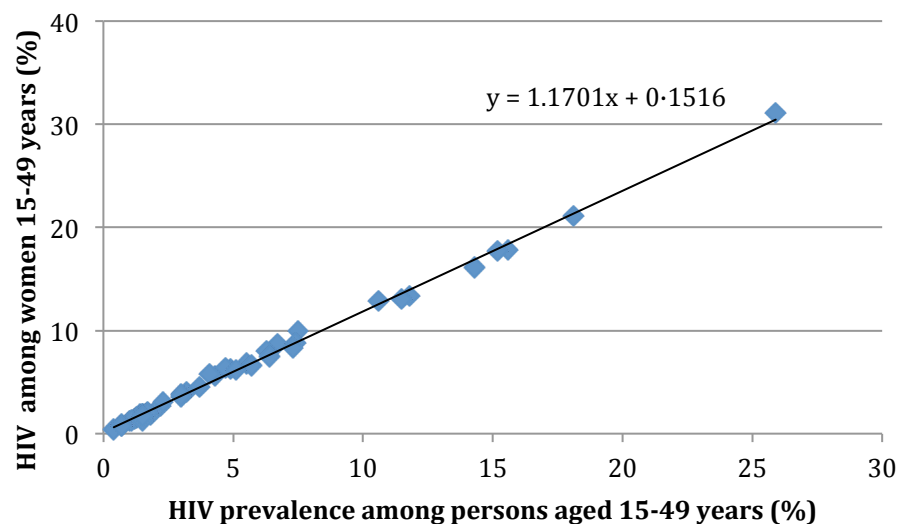



**Supplement S4: Meta-regression of the prevalence ratio of malaria among children 0-59 months versus pregnant women by gravidity**

**Table S4a: Meta-regression of factors potentially affecting the prevalence ratio of malaria among children 0-59 months of age versus primigravidae, sub-Saharan Africa, 1983-2012**

| Univariate analysis                   |                    |                 |                                     |                                                     |                            |           |                  |                |                        |                 |
|---------------------------------------|--------------------|-----------------|-------------------------------------|-----------------------------------------------------|----------------------------|-----------|------------------|----------------|------------------------|-----------------|
| Covariate                             | Type of covariate  | No. of surveys† | Pooled prevalence ratio by subgroup | I <sup>2</sup> and 95% CI for subgroup analysis (%) | Odds ratio meta-regression | 95% CI    | p-value by level | τ <sup>2</sup> | Variance explained (%) | p-value overall |
| No covariates                         |                    | 8               |                                     |                                                     |                            |           |                  | 0.010          |                        |                 |
| (Sub)national survey                  | Yes                | 4               | 1.17, 1.04-1.32                     | 0, 0-85                                             | 1.01                       | 0.75-1.37 | 0.939            | 0.014          | 0.0                    | 0.939           |
|                                       | No                 | 4               | 1.15, 0.97-1.37                     | 76, 33-91                                           | 1.00                       | Reference |                  |                |                        |                 |
| Place of recruitment pregnant women   | ANC                | 1               | 0.90, 0.70-1.17                     |                                                     | 0.76                       | 0.51-1.12 | 0.130            | 0.006          | 40.0                   | 0.130           |
|                                       | Community          | 7               | 1.20, 1.08-1.32                     | 36, 0-73                                            | 1.00                       | Reference |                  |                |                        |                 |
| Malaria test                          | RDT                | 1               | 0.94, 0.62-1.40                     |                                                     | 0.79                       | 0.44-1.42 | 0.368            | 0.010          | 0.0                    | 0.368           |
|                                       | BS                 | 7               | 1.18, 1.05-1.31                     | 53, 0-80                                            | 1.00                       | Reference |                  |                |                        |                 |
| Time period                           | 2000+              | 5               | 1.16, 1.05-1.29                     | 0, 0-79                                             | 1.00                       | Reference | 0.964            | 0.015          | 0.0                    | 0.964           |
|                                       | <2000              | 3               | 1.15, 0.90-1.47                     | 84, 53-95                                           | 0.99                       | 0.74-1.34 |                  |                |                        |                 |
| Malaria transmission intensity*       | Continuous         | 8               |                                     |                                                     | 0.99                       | 0.99-1.01 | 0.582            | 0.011          | 0.0                    | 0.582           |
|                                       | >40%               | 5               | 1.16, 0.92-1.47                     | 66, 12-87                                           | 0.99                       | 0.68-1.46 | 0.992            | 0.012          | 0.0                    | 0.992           |
|                                       | 5-40%              | 3               | 1.16, 1.02-1.32                     | 0, 0-90                                             | 1.00                       | Reference |                  |                |                        |                 |
| Antimalarial regimen during pregnancy | None               | 2               | 1.13, 1.04-1.23                     |                                                     | 1.00                       | Reference |                  | 0.020          | 0.0                    | 0.971           |
|                                       | IPTp               | 4               | 1.16, 0.99-1.35                     | 0, 0-85                                             | 1.02                       | 0.68-1.52 | 0.915            |                |                        |                 |
|                                       | Prophylaxis†       | 2               | 1.15, 0.72-1.86                     |                                                     | 1.04                       | 0.68-1.59 | 0.819            |                |                        |                 |
| ITN use during Pregnancy              | No ITN information | 5               | 1.16, 1.02-1.32                     | 66, 12-87                                           | 1.00                       | Reference |                  | 0.013          | 0.0                    | 0.807           |
|                                       | ITN use < 25%      | 2               | 1.11, 0.83-1.48                     |                                                     | 0.95                       | 0.60-1.51 | 0.790            |                |                        |                 |
|                                       | ITN use ≥25%       | 1               | 1.39, 0.82-2.38                     |                                                     | 1.20                       | 0.53-2.71 | 0.585            |                |                        |                 |
| Age definition of child group         | 0-59 months        | 4               | 1.11, 1.03-1.20                     | 7, 0-86                                             | 1.00                       | Reference |                  | 0.0            | 100.0                  | 0.096           |
|                                       | 6-59 months        | 3               | 1.16, 0.92-1.47                     | 0, 0-90                                             | 1.04                       | 0.75-1.45 | 0.751            |                |                        |                 |
|                                       | Other              | 1               | 1.45, 1.22-1.71                     |                                                     | 1.30                       | 1.02-1.66 | 0.039            |                |                        |                 |
| Estimate maternal HIV infection (%)   | Continuous         | 8               |                                     |                                                     | 1.00                       | 0.98-1.01 | 0.861            | 0.014          | 0.0                    | 0.861           |
|                                       | >9%                | 4               | 1.14, 1.06-1.23                     | 0, 0-85                                             | 0.99                       | 0.73-1.33 | 0.939            | 0.014          | 0.0                    | 0.939           |
|                                       | ≤ 9%               | 4               | 1.14, 0.85-1.54                     | 74, 27-91                                           | 1.00                       | Reference |                  |                |                        |                 |
| Quality survey                        | Good               | 5               | 1.17, 1.02-1.35                     | 67, 15-87                                           | 1.04                       | 0.74-1.45 | 0.792            | 0.013          | 0.0                    | 0.792           |
|                                       | Low to moderate    | 3               | 1.13, 0.95-1.35                     | 0, 0-90                                             | 1.00                       | Reference |                  |                |                        |                 |

Abbreviations: ANC: antenatal clinic, CI: confidence interval, ITN: insecticide treated net, RDT: rapid diagnostic malaria test, SP: sulfadoxine-pyrimethamine

Note: None of the factors with a p-value <0.2 (age definition of child, place of recruitment or maternal HIV infection) was significant in multivariate analysis

\* Average malaria transmission: average of child and maternal malaria

† Any dose for any time period of prophylaxis, i.e. not IPTp regimen

**Table S4b: Meta-regression of factors potentially affecting the prevalence ratio of malaria among children 0-59 months of age versus multigravidae, 7 studies, sub-Saharan Africa, 1983-2012**

| Covariate                             | Univariate analysis |                 |                                     |                                                     |                            |           |                  |                |                        |                 |
|---------------------------------------|---------------------|-----------------|-------------------------------------|-----------------------------------------------------|----------------------------|-----------|------------------|----------------|------------------------|-----------------|
|                                       | Type of covariate   | No. of surveys† | Pooled prevalence ratio by subgroup | I <sup>2</sup> and 95% CI for subgroup analysis (%) | Odds ratio meta-regression | 95% CI    | p-value by level | τ <sup>2</sup> | Variance explained (%) | p-value overall |
| No covariates                         |                     | 7               | 1.94, 1.68-2.24                     |                                                     |                            |           |                  | 0.032          |                        |                 |
| (Sub)national survey                  | Yes                 | 4               | 2.12, 1.56-2.88                     | 80, 46-92                                           | 1.13                       | 0.68-1.88 | 0.567            | 0.047          | 0.0                    | 0.567           |
|                                       | No                  | 3               | 1.86, 1.53-2.27                     | 82, 46-94                                           | 1.00                       | Reference |                  |                |                        |                 |
| Place of recruitment pregnant women   | ANC                 | 1               | 1.54, 1.22-1.94                     |                                                     | 0.76                       | 0.39-1.46 | 0.328            | 0.032          | 1.7                    | 0.328           |
|                                       | Community           | 6               | 2.02, 1.72-2.36                     | 81, 60-91                                           | 1.00                       | Reference |                  |                |                        |                 |
| Malaria test                          | RDT                 | 1               | 1.68, 1.19-2.38                     |                                                     | 0.84                       | 0.37-1.90 | 0.614            | 0.041          | 0.0                    | 0.614           |
|                                       | Microscopy          | 6               | 1.97, 1.69-2.31                     | 83, 64-92                                           | 1.00                       | Reference |                  |                |                        |                 |
| Time period                           | 2000+               | 5               | 1.96, 1.65-2.33                     | 73, 32-89                                           | 1.00                       | Reference | 0.744            | 0.050          | 0.0                    | 0.744           |
|                                       | <2000               | 2               | 1.86, 1.30-2.67                     | 88, 52-97                                           | 0.93                       | 0.53-1.63 |                  |                |                        |                 |
| Malaria transmission intensity*       | Continuous          |                 |                                     |                                                     | 0.99                       | 0.98-1.01 | 0.420            | 0.042          | 0.0                    | 0.420           |
|                                       | >40%                | 4               | 1.81, 1.54-2.12                     | 85, 63-94                                           | 0.77                       | 0.48-1.23 | 0.209            | 0.025          | 21.1                   | 0.209           |
|                                       | 5-40%               | 3               | 2.38, 1.63-3.48                     | 69, 0-91                                            | 1.00                       | Reference |                  |                |                        |                 |
| Antimalarial regimen during pregnancy | None                | 2               | 1.91, 1.44-2.54                     | 94, 83-98                                           | 1.00                       | Reference |                  | 0.048          | 0.0                    | 0.567           |
|                                       | IPTp                | 4               | 2.16, 1.64-2.85                     | 73, 23-90                                           | 1.13                       | 0.61-2.07 | 0.615            |                |                        |                 |
|                                       | Prophylaxis†        | 1               | 1.54, 1.22-1.94                     |                                                     | 0.80                       | 0.34-1.91 | 0.523            |                |                        |                 |
| ITN use during Pregnancy              | No ITN information  | 4               | 1.81, 1.54-2.12                     | 85, 63-94                                           | 1.00                       | Reference |                  | 0.020          | 37.4                   | 0.202           |
|                                       | ITN use < 25%       | 2               | 2.06, 1.40-3.04                     | 63, 0-92                                            | 1.15                       | 0.69-1.89 | 0.495            |                |                        |                 |
|                                       | ITN use ≥25%        | 1               | 3.41, 2.16-5.38                     |                                                     | 1.89                       | 0.83-4.26 | 0.097            |                |                        |                 |
| Age definition of child group         | 0-59 months         | 4               | 1.81, 1.54-2.12                     | 85, 63-94                                           | 1.00                       | Reference |                  | 0.025          | 21.1                   | 0.209           |
|                                       | 6-59 months         | 3               | 2.38, 1.63-3.48                     | 69, 0-91                                            | 1.30                       | 0.81-2.08 | 0.209            |                |                        |                 |
|                                       | 12-59 months        | 0               |                                     |                                                     |                            |           |                  |                |                        |                 |
| Estimate maternal HIV infection (%)   | Continuous          | 7               |                                     |                                                     | 1.01                       | 0.98-1.04 | 0.651            | 0.039          | 0.0                    | 0.651           |
|                                       | >9%                 | 4               | 1.96, 1.66-2.31                     | 85, 63-94                                           | 1.02                       | 0.59-1.78 | 0.923            | 0.044          | 0.0                    | 0.923           |
|                                       | ≤ 9%                | 3               | 2.00, 1.28-3.13                     | 81, 42-94                                           | 1.00                       | Reference |                  |                |                        |                 |
| Quality survey                        | Good                | 4               | 1.91, 1.56-2.34                     | 87, 68-95                                           | 0.93                       | 0.54-1.60 | 0.754            | 0.047          | 0.0                    | 0.754           |
|                                       | Low to moderate     | 3               | 2.08, 1.48-2.92                     | 74, 14-92                                           | 1.00                       | Reference |                  |                |                        |                 |

Abbreviations: ANC: antenatal clinic, CI: confidence interval, IPTp: intermittent preventive treatment in pregnancy, ITN: insecticide treated net, RDT: rapid diagnostic malaria test,

\* Average malaria transmission: average of child and maternal malaria

† Any dose for any time period of prophylaxis, not IPTp regimen

**Supplement S5: Antenatal clinic attendance in malarious countries in sub-Saharan Africa by setting, 2008-2014**

**Table S5: Antenatal clinic attendance and timing of first antenatal visit in national surveys in malarious countries by setting and malaria prevalence among children, sub-Saharan Africa, 2008-2014**

| Country               | Survey      | At least one antenatal visit, % |       |       | Start of 1 <sup>st</sup> visit before 6 months, % |       |       | Survey      | Malaria prevalence in survey among children months, % |      |      |       |       |
|-----------------------|-------------|---------------------------------|-------|-------|---------------------------------------------------|-------|-------|-------------|-------------------------------------------------------|------|------|-------|-------|
|                       |             | All                             | Urban | Rural | All                                               | Urban | Rural |             | Test                                                  | Age* | All  | Urban | Rural |
| Angola                | NA          |                                 |       |       |                                                   |       |       | MIS 2011    | Mx                                                    | 6-59 | 10.1 | 1.4   | 14.0  |
| Benin                 | DHS 2011-12 | 85.8                            | 91.3  | 82.1  | 75.6                                              | 79.6  | 72.8  | DHS 2011-12 | Mx                                                    | 6-59 | 28.4 | 20.8  | 33.2  |
| Burkina Faso          | DHS 2010    | 94.9                            | 98.3  | 94.1  | 80.2                                              | 87.1  | 78.6  | DHS 2010    | Mx                                                    | 6-59 | 65.9 | 29.8  | 72.9  |
| Burundi               | DHS 2010    | 98.9                            | 99.0  | 98.9  | 64.7                                              | 80.4  | 63.2  | DHS 2010    | ND                                                    |      |      |       |       |
| Cameroon              | DHS 2011    | 84.7                            | 95.6  | 75.6  | 69.9                                              | 82.5  | 59.4  | DHS 2011    | RDT                                                   | 6-59 | 30.0 | 20.6  | 37.1  |
| CAR                   | MICS 2010   | 68.2                            | 88.3  | 57.4  | NA                                                |       |       |             | NA                                                    |      |      |       |       |
| Chad                  | MICS 2010   | 53.2                            | 78.3  | 45.7  | NA                                                |       |       |             | NA                                                    |      |      |       |       |
| Republic of Congo     | DHS 2011-12 | 92.6                            | 95.9  | 86.8  | 84.5                                              | 88.7  | 76.8  | DHS 2011-12 | ND                                                    |      |      |       |       |
| DR Congo              | DHS 2013-14 | 88.4                            | 94.1  | 85.8  | 57.7                                              | 68.0  | 52.9  | DHS 2013-14 | Mx                                                    | 6-59 | 22.6 | 19.6  | 23.9  |
| Côte d'Ivoire         | DHS 2011-12 | 90.6                            | 96.7  | 86.5  | 64.3                                              | 77.2  | 55.9  | DHS 2011-12 | MX                                                    | 6-59 | 18.0 | 7.4   | 24.1  |
| Equatorial Guinea     | DHS 2011    | 91.3                            | 93.3  | 89.4  | 87.4                                              | 90.0  | 84.9  | DHS 2011    | RDT                                                   | 6-59 | 47.8 | 29.9  | 62.6  |
| Eritrea               | DHS 2010    | 88.5                            | 97.3  | 84.2  | 70.7                                              | 83.6  | 64.5  |             | ND                                                    |      |      |       |       |
| Ethiopia              | DHS 2011    | 33.9                            | 76.0  | 26.4  | 27.7                                              | 62.5  | 21.5  |             | ND                                                    |      |      |       |       |
| Gabon                 | DHS 2012    | 94.7                            | 96.1  | 85.7  | 88.9                                              | 90.8  | 77.5  |             | ND                                                    |      |      |       |       |
| The Gambia            | DHS 2013    | 86.2                            | 87.5  | 84.9  | NA                                                |       |       | DHS 2013    | Mx                                                    | 6-59 | 0.8  | 1.1   | 0.5   |
| Ghana                 | MICS 2011   | 96.4                            | 98.0  | 95.2  | NA                                                |       |       | MICS 2011   | Mx                                                    | 6-59 | 27.5 | 13.1  | 38.8  |
| Guinea                | DHS 2012    | 85.2                            | 96.3  | 80.8  | 70.8                                              | 85.8  | 64.8  | DHS 2012    | Mx                                                    | 6-59 | 43.9 | 18.1  | 52.6  |
| Kenya                 | DHS 2014    | 95.5                            | 97.8  | 94.0  | NA                                                |       |       | MIS 2010    | Mx                                                    | 6-59 | 8.2  | NA    | NA    |
| Liberia               | DHS 2013    | 95.9                            | 98.0  | 93.4  | 93.3                                              | 90.7  | 87.5  |             | ND                                                    |      |      |       |       |
| Madagascar            | DHS 2008-09 | 86.3                            | 94.7  | 85.1  | 69.6                                              | 85.4  | 67.3  | MIS 2013    | Mx                                                    | 6-59 | 9.1  | 2.9   | 9.5   |
| Malawi                | DHS 2010    | 94.7                            | 96.2  | 94.4  | 60.6                                              | 61.7  | 60.5  | MIS 2012    | Mx                                                    | 6-59 | 27.7 | 9.4   | 30.4  |
| Mali                  | DHS 2012-13 | 74.2                            | 93.2  | 69.3  | 60.7                                              | 82.0  | 55.1  | DHS 2012-13 | Mx                                                    | 6-59 | 51.6 | 16.8  | 59.5  |
| Mauritania            | MICS 2011   | 84.2                            | 92.4  | 78.5  | NA                                                |       |       |             | NA                                                    |      |      |       |       |
| Mozambique            | DHS 2011    | 90.6                            | 96.3  | 88.2  | 60.0                                              | 65.6  | 57.7  | DHS 2011    | Mx                                                    | 6-59 | 35.1 | 16.2  | 42.2  |
| Namibia               | DHS 2013    | 96.6                            | 96.7  | 96.5  | 80.9                                              | 80.7  | 81.1  | DHS 2013    | ND                                                    |      |      |       |       |
| Niger                 | DHS 2012    | 82.8                            | 96.9  | 80.4  | 62.0                                              | 84.5  | 58.2  | DHS 2012    | ND                                                    |      |      |       |       |
| Nigeria               | DHS 2013    | 60.6                            | 86.0  | 46.5  | 47.5                                              | 65.8  | 37.5  | MIS 2010    | Mx                                                    | 6-59 | 42.0 | 22.5  | 47.7  |
| Rwanda                | DHS 2010    | 98.0                            | 98.3  | 98.0  | 76.5                                              | 78.5  | 76.3  | DHS 2010    | Mx                                                    | 6-59 | 1.4  | 0.8   | 1.4   |
| Sao Tome and Principe | DHS 2008-09 | 97.9                            | 98.4  | 97.5  | 81.7                                              | 84.0  | 79.6  |             | ND                                                    |      |      |       |       |
| Senegal               | DHS 2014    | 96.2                            | 99.2  | 93.8  | 85.9                                              | 91.5  | 81.3  | DHS 2014    | Mx                                                    | 6-59 | 1.2  | 0.3   | 1.9   |
| Sierra Leone          | DHS 2013    | 97.1                            | 98.2  | 96.7  | 86.5                                              | 86.6  | 86.4  | MIS 2013    | Mx                                                    | 6-59 | 42.9 | 28.1  | 48.0  |
| Somalia               | MICS 2011   | 28.0                            | 38.2  | 15.3  | NA                                                |       |       |             | NA                                                    |      |      |       |       |
| South Sudan           | MICS 2010   | 40.3                            | 57.6  | 34.2  | NA                                                |       |       |             | NA                                                    |      |      |       |       |
| Sudan                 | MICS 2010   | 74.3                            | 84.3  | 70.4  | NA                                                |       |       |             | NA                                                    |      |      |       |       |
| Tanzania              | DHS 2010    | 95.9                            | 98.6  | 95.1  | 64.8                                              | 64.7  | 66.1  | MIS 2011-12 | Mx                                                    | 6-59 | 4.1  | 1.0   | 4.7   |
| Togo                  | DHS 2013    | 72.7                            | 96.5  | 58.4  | 69.2                                              | 80.4  | 63.3  |             | Mx                                                    | 6-59 | 36.4 | 14.5  | 47.4  |
| Uganda                | DHS 2011    | 94.9                            | 97.4  | 94.4  | 64.7                                              | 68.8  | 63.9  | MIS 2009    | Mx                                                    | 0-59 | 42.4 | 15.3  | 47.1  |
| Zambia                | DHS 2013-14 | 95.7                            | 98.6  | 94.0  | 79.6                                              | 79.3  | 79.8  | MIS 2012    | Mx                                                    | 0-59 | 14.9 | 3.7   | 20.2  |
| Zimbabwe              | DHS 2011-12 | 89.8                            | 89.9  | 89.8  | 58.9                                              | 54.5  | 60.9  |             | ND                                                    |      |      |       |       |

Abbreviations: CAR: Central African Republic, DHS: Demographic and Health Survey, DRC: Democratic Republic of the Congo, MICS: Multiple Indicator Cluster Survey, MIS: Malaria Indicator Survey, Mx: microscopy, NA: not available, ND: not done, RDT: rapid diagnostic malaria test

\*Age in months

## References

1. von Elm E, Altman DG, Egger M, et al. The Strengthening the Reporting of Observational Studies in Epidemiology (STROBE) statement: guidelines for reporting observational studies. *Bull World Health Organ* 2007; **85**: 867–72.
2. Sanderson S, Tatt ID, Higgins JP. Tools for assessing quality and susceptibility to bias in observational studies in epidemiology: a systematic review and annotated bibliography. *Int J Epidemiol* 2007; **36**: 666–76.
3. Consultaria de Servicos e Pesquisas Lda., Consultorio de Gestao e Administracao em Saude-Consaude Lda., Macro International Inc. Angola Malaria Indicator Survey 2006-07. Calverton: COSEP Lda., Consaude LDA., and Macro International Inc., 2007.
4. Institut National de la Statistique and ICF International. Côte d'Ivoire Demographic and Health Survey and Multiple Indicator Survey 2011-2012. Calverton: INS and ICF International, 2012.
5. Deribew A, Alemseged F, Birhanu Z, et al. Effect of training on the use of long-lasting insecticide-treated bed nets on the burden of malaria among vulnerable groups, south-west Ethiopia: baseline results of a cluster randomized trial. *Malar J* 2010; **9**: 121.
6. Dicko A, Mantel C, Kouriba B, et al. Season, fever prevalence and pyrogenic threshold for malaria disease definition in an endemic area of Mali. *Trop Med Int Health* 2005; **10**: 550–6.
7. Dicko A, Mantel C, Thera MA, et al. Risk factors for malaria infection and anemia for pregnant women in the Sahel area of Bandiagara, Mali. *Acta Trop* 2003; **89**: 17–23.
8. Ministry of Health and Social Welfare, Medical Care Development International. Equatorial Guinea Malaria Control Initiative (EGMCI) Annual Malaria Indicator Survey Report 2007-2009, 2009.
9. Graves PM, Richards FO, Ngondi J, et al. Individual, household and environmental risk factors for malaria infection in Amhara, Oromia and SNNP regions of Ethiopia. *Trans R Soc Trop Med Hyg* 2009; **103**: 1211–20.
10. Mabunda SJA. The epidemiology and the burden of malaria in Mozambique: University of Barcelona, Faculty of Medicine, Department of Public Health, Barcelona, Spain; 2006.
11. Matola YG, Malle LN. Factors affecting the compliance of malaria chemosuppression with chloroquine at some maternal and child health clinics in Tanga Region, Tanzania. *East Afr Med J* 1985; **62**: 720–4.
12. Bloland PB, Boriga DA, Ruebush TK, et al. Longitudinal cohort study of the epidemiology of malaria infections in an area of intense malaria transmission II. Descriptive epidemiology of malaria infection and disease among children. *Am J Trop Med Hyg* 1999; **60**: 641–8.
13. McElroy PD, Lal AA, Hawley WA, et al. Analysis of repeated hemoglobin measures in full-term, normal birth weight Kenyan children between birth and four years of age. III. The Asemobo Bay Cohort Project. *Am J Trop Med Hyg* 1999; **61**: 932–40.
14. Ministry of Health Mozambique, National Directorate of Public Health, National Malaria Control Programme. National Malaria Indicator Survey Mozambique (MIS - 2007). 2009.
15. Ministry of Health and Social Services Namibia. Namibia Malaria Indicator Survey 2009. Windhoek: National Vector-borne Diseases Control Programme, 2009.
16. Nyan O, Jallow COA, Manneh K, Jarjou E. Malaria baseline survey Final report (The Gambia). The Gambia, 2009.
17. Rehman AM, Mann AG, Schwabe C, et al. Five years of malaria control in the continental region, Equatorial Guinea. *Malar J* 2013; **12**: 154.
18. Ministry of Health of Rwanda, National Institute of Statistics of Rwanda, ICF Macro. Rwanda Interim Demographic and Health Survey 2007-08. Calverton: Minisanté, INSR and ICF Macro, 2009.
19. National Institute of Statistics of Rwanda, Ministry of Health Rwanda, ICF International. Rwanda Demographic and Health Survey 2010. Calverton: NISR, MOH and ICF International, 2012.
20. Eyobo MB, Awur AC, Wani G, et al. Malaria indicator survey 2009, South Sudan: baseline results at household level. *Malar J* 2014; **13**: 45.
21. National Malaria Control Program Sudan. Malaria prevalence and coverage indicators survey Sudan October 2005. Khartoum: Federal Ministry of Health (Sudan), National Malaria Control Program, 2005.
22. van Eijk AM, Lindblade KA, Odhiambo F, et al. Reproductive health issues in rural Western Kenya. *Reprod Health* 2008; **5**: 1.
23. Index Mundi. Country Facts. <http://www.indexmundi.com/> (accessed November 25, 2014).
24. National Institute of Health Mozambique, National Institute of Statistics, Macro I. HIV/AIDS sero-behavioural survey in Mozambique 2009. Calverton: National Institute of Health, National Institute of Statistics, ICF Macro, 2010.
25. Central Bureau of Statistics Kenya, Ministry of Health of Kenya, ORC Macro. Kenya Demographic and Health Survey 2003. Calverton: CBS, MOH, and ORC Macro, 2004.
